# Supplementary material for: Microbial Interrelationships across Sites of Breastfeeding Mothers and Infants at 6 Weeks Postpartum
Source: MDPI journal article supplement (doi:10.3390/microorganisms10061155), 2022-06-02
Supplement: s1 [file s1]

**Table S1. Beta diversity measures between feeding groups by sample type**

|                 | Unweighted<br>UniFrac | Weighted<br>UniFrac | Bray-Curtis<br>Dissimilarity |
|-----------------|-----------------------|---------------------|------------------------------|
|                 |                       | p-value             |                              |
| Human milk      | 0.05                  | 0.05                | 0.57                         |
| Breast skin     | 0.59                  | 0.21                | 0.17                         |
| Infant saliva   | 0.72                  | 0.004               | 0.001                        |
| Maternal saliva | 0.54                  | 0.06                | 0.27                         |
| Infant stool    | 0.06                  | 0.15                | 0.37                         |
| Maternal stool  | 0.37                  | 0.93                | 0.36                         |

N=33 dyads (EBF=20, MF=13). Data were analyzed by PERMANOVA.

**Table S2. Relative abundance (%) of bacterial genera in human milk samples by feeding mode**

| Genus                             | EBF        | MF         |
|-----------------------------------|------------|------------|
| <i>Staphylococcus</i>             | 45.4 ± 6.8 | 48.8 ± 9.9 |
| <i>Streptococcus</i> <sup>†</sup> | 33.4 ± 5.9 | 19.0 ± 5.9 |
| <i>Corynebacterium 1</i>          | 4.1 ± 1.8  | 2.9 ± 1.2  |
| <i>Rothia</i>                     | 3.5 ± 1.6  | 1.3 ± 0.4  |
| <i>Gemella</i>                    | 1.9 ± 1.0  | 0.6 ± 0.4  |
| <i>Veillonella</i>                | 1.1 ± 0.7  | 1.8 ± 1.4  |
| <i>Cutibacterium</i>              | 1.3 ± 0.7  | 0.7 ± 0.4  |
| <i>Bifidobacterium</i>            | 0.2 ± 0.2  | 0.6 ± 0.6  |
| <i>Actinomyces</i>                | 0.2 ± 0.1  | 0.3 ± 0.2  |
| <i>Streptomyces</i>               | 0.3 ± 0.1  | 0.1 ± 0.1  |

N=33 mothers (EBF=20, MF=13). Only genera present in ≥ 20% of samples and at ≥ 0.1% abundance are included in the table. Data are expressed mean ± SEM and were analyzed using the GLIMMIX procedure including delivery mode as a covariate. Values within the same row are significantly different at \*p≤ 0.5; <sup>†</sup>p≤ 0.1. EBF, exclusively breastfeeding; MF, mixed-feeding.

**Table S3. Relative abundance (%) of 20 most abundant bacterial genera on breast skin by feeding mode**

| <b>Genus</b>                    | <b>EBF</b> | <b>MF</b>  |
|---------------------------------|------------|------------|
| <i>Streptococcus</i>            | 41.7 ± 4.0 | 31.4 ± 5.1 |
| <i>Staphylococcus</i>           | 32.7 ± 5.3 | 37.5 ± 8.2 |
| <i>Corynebacterium 1</i>        | 7.1 ± 1.6  | 5.4 ± 1.2  |
| <i>Gemella</i>                  | 3.0 ± 0.9  | 1.5 ± 0.6  |
| <i>Veillonella</i>              | 2.0 ± 0.5  | 3.1 ± 0.8  |
| <i>Rothia</i>                   | 2.0 ± 0.5  | 2.6 ± 1.2  |
| <i>Lactobacillus</i>            | 2.0 ± 1.9  | 0.4 ± 0.2  |
| <i>Prevotella 7</i>             | 0.4 ± 0.4  | 1.9 ± 1.3  |
| <i>Actinomyces</i>              | 1.0 ± 0.4  | 1.1 ± 0.5  |
| <i>Haemophilus</i>              | 0.6 ± 0.4  | 1.5 ± 1.1  |
| <i>Atopobium</i>                | 0.5 ± 0.2  | 1.4 ± 0.7  |
| <i>Acinetobacter</i>            | 0.6 ± 0.2  | 1.0 ± 0.4  |
| <i>Micrococcus</i>              | 0.6 ± 0.3  | 0.7 ± 0.3  |
| <i>Cutibacterium</i>            | 0.5 ± 0.1  | 0.9 ± 0.4  |
| <i>Anaerococcus<sup>†</sup></i> | 0.2 ± 0.1  | 0.9 ± 0.3  |
| <i>Bacteroides</i>              | 0.3 ± 0.1  | 0.7 ± 0.3  |
| <i>Bifidobacterium</i>          | 0.2 ± 0.1  | 0.8 ± 0.6  |
| <i>Enhydrobacter</i>            | 0.4 ± 0.2  | 0.3 ± 0.1  |
| <i>Neisseria</i>                | 0.1 ± 0.0  | 0.3 ± 0.2  |
| <i>Lawsonella</i>               | 0.2 ± 0.1  | 0.3 ± 0.2  |

N=33 mothers (EBF=20, MF=13). Only genera present in ≥ 20% of samples and at ≥ 0.1% abundance are included in the table. Data are expressed mean ± SEM and were analyzed using the GLIMMIX procedure including delivery mode as a covariate. Values within the same row are significantly different at \*p≤ 0.5; †p≤ 0.1. EBF, exclusively breastfeeding; MF, mixed-feeding.

**Table S4. Relative abundance (%) of bacterial genera in infant saliva by feeding mode**

| Genus                  | EBF        | MF         |
|------------------------|------------|------------|
| <i>Streptococcus</i> * | 67.4 ± 3.5 | 53.5 ± 4.5 |
| <i>Gemella</i> *       | 15.1 ± 2.3 | 7.9 ± 2.0  |
| <i>Veillonella</i> *   | 3.9 ± 1.2  | 10.7 ± 2.1 |
| <i>Rothia</i>          | 3.6 ± 1.3  | 9.6 ± 3.1  |
| <i>Haemophilus</i>     | 5.2 ± 2.4  | 2.9 ± 2.6  |
| <i>Prevotella 7</i>    | 0.4 ± 0.3  | 2.5 ± 1.8  |
| <i>Atopobium</i>       | 1.0 ± 0.8  | 1.3 ± 1.0  |
| <i>Neisseria</i>       | 0.0 ± 0.0  | 2.4 ± 2.4  |
| <i>Porphyromonas</i>   | 0.5 ± 0.5  | 0.8 ± 0.5  |
| <i>Staphylococcus</i>  | 0.4 ± 0.2  | 1.0 ± 0.8  |
| <i>Bergeyella</i>      | 0.5 ± 0.2  | 0.8 ± 0.3  |
| <i>Actinomyces</i>     | 0.4 ± 0.2  | 0.6 ± 0.4  |

N=33 infants (EBF=20, MF=13). Only genera present in  $\geq 20\%$  of samples and at  $\geq 0.1\%$  abundance are included in the table. Data are expressed mean  $\pm$  SEM and were analyzed using the GLIMMIX procedure including delivery mode as a covariate. Values within the same row are significantly different at \* $p \leq 0.5$ ; † $p \leq 0.1$ . EBF, exclusively breastfeeding; MF, mixed-feeding.

**Table S5. Relative abundance (%) of bacterial genera in infant stool by feeding mode**

| Genus                              | EBF        | MF         |
|------------------------------------|------------|------------|
| <i>Bifidobacterium</i>             | 17.1 ± 4.7 | 31.2 ± 6.7 |
| <i>Escherichia-Shigella</i>        | 16.0 ± 5.0 | 17.1 ± 6.3 |
| <i>Bacteroides</i>                 | 17.0 ± 5.1 | 7.0 ± 4.9  |
| <i>Klebsiella</i>                  | 9.4 ± 3.9  | 6.8 ± 4.0  |
| <i>Clostridium sensu stricto 1</i> | 7.2 ± 3.1  | 0.8 ± 0.5  |
| <i>Enterobacter</i>                | 6.2 ± 3.6  | 2.1 ± 1.5  |
| <i>Veillonella</i>                 | 4.0 ± 1.9  | 4.7 ± 3.7  |
| <i>Enterococcus</i>                | 2.0 ± 0.9  | 5.3 ± 3.7  |
| <i>Streptococcus</i>               | 2.1 ± 0.6  | 2.3 ± 1.1  |
| <i>Ruminococcus gnavus group</i>   | 0.6 ± 0.4  | 4.0 ± 2.6  |
| <i>Haemophilus</i>                 | 2.0 ± 1.2  | 0.6 ± 0.6  |
| <i>Staphylococcus</i>              | 0.7 ± 0.3  | 0.2 ± 0.1  |
| <i>Lactobacillus</i>               | 0.5 ± 0.3  | 0.2 ± 0.1  |
| <i>Eggerthella</i>                 | 0.0 ± 0.0  | 0.9 ± 0.6  |

N=32 infants (EBF=20, MF=12). Only genera present in  $\geq 20\%$  of samples and at  $\geq 0.1\%$  abundance are included in the table. Data are expressed mean  $\pm$  SEM and were analyzed using the GLIMMIX procedure including delivery mode as a covariate. Values within the same row are significantly different at \* $p \leq 0.5$ ; † $p \leq 0.1$ . EBF, exclusively breastfeeding; MF, mixed-feeding.

**Table S6. Relative abundance (%) of 20 most abundant bacterial genera in maternal saliva by feeding mode**

| <b>Genus</b>                            | <b>EBF</b> | <b>MF</b>  |
|-----------------------------------------|------------|------------|
| <i>Streptococcus</i>                    | 17.3 ± 1.5 | 19.3 ± 2.1 |
| <i>Prevotella 7</i>                     | 17.1 ± 1.7 | 13.5 ± 1.4 |
| <i>Neisseria</i>                        | 8.7 ± 1.9  | 11.7 ± 2.3 |
| <i>Haemophilus</i>                      | 10.0 ± 1.3 | 7.7 ± 1.2  |
| <i>Fusobacterium*</i>                   | 6.4 ± 1.2  | 10.0 ± 1.2 |
| <i>Veillonella</i>                      | 6.3 ± 0.7  | 6.0 ± 1.1  |
| <i>Alloprevotella</i>                   | 5.0 ± 0.5  | 4.1 ± 0.8  |
| <i>Porphyromonas</i>                    | 3.3 ± 0.9  | 3.4 ± 0.8  |
| <i>Rothia</i>                           | 2.9 ± 0.6  | 3.2 ± 0.7  |
| <i>Leptotrichia</i>                     | 2.7 ± 0.5  | 3.1 ± 1.4  |
| <i>Actinomyces</i>                      | 2.5 ± 0.4  | 2.2 ± 0.4  |
| <i>Prevotella</i>                       | 2.6 ± 0.4  | 1.6 ± 0.2  |
| <i>Campylobacter</i>                    | 1.5 ± 0.3  | 2.4 ± 0.6  |
| <i>Saccharimonadaceae uncultured*</i>   | 2.0 ± 0.3  | 1.0 ± 0.3  |
| <i>Atopobium</i>                        | 1.6 ± 0.4  | 1.3 ± 0.3  |
| <i>Gemella</i>                          | 0.9 ± 0.1  | 1.4 ± 0.4  |
| <i>Granulicatella*</i>                  | 1.1 ± 0.1  | 0.8 ± 0.1  |
| <i>Absconditabacteriales uncultured</i> | 1.0 ± 0.5  | 0.5 ± 0.2  |
| <i>Prevotella 6†</i>                    | 0.9 ± 0.1  | 0.5 ± 0.1  |
| <i>Lachnoanaerobaculum</i>              | 0.5 ± 0.1  | 0.4 ± 0.0  |

N=33 mothers (EBF=20, MF=13). Only genera present in  $\geq 20\%$  of samples and at  $\geq 0.1\%$  abundance are included in the table. Data are expressed mean  $\pm$  SEM and were analyzed using the GLIMMIX procedure including BMI at 6 wk postpartum as a covariate. Values within the same row are significantly different at \* $p \leq 0.5$ ; † $p \leq 0.1$ . EBF, exclusively breastfeeding; MF, mixed-feeding.

**Table S7. Relative abundance (%) of 20 most abundant bacterial genera present in maternal stool by feeding mode**

| <b>Genus</b>                            | <b>EBF</b> | <b>MF</b>  |
|-----------------------------------------|------------|------------|
| <i>Bacteroides</i> <sup>†</sup>         | 17.0 ± 2.2 | 18.7 ± 3.9 |
| <i>Faecalibacterium</i>                 | 12.2 ± 2.1 | 9.9 ± 2.4  |
| <i>Blautia</i>                          | 7.2 ± 1.1  | 9.8 ± 2.3  |
| <i>Akkermansia</i>                      | 4.8 ± 1.6  | 5.3 ± 2.2  |
| <i>Subdoligranulum</i>                  | 3.5 ± 1.2  | 3.4 ± 1.0  |
| <i>Eubacterium hallii</i> group         | 3.6 ± 0.6  | 3.1 ± 0.9  |
| <i>Ruminococcus</i> 2                   | 3.5 ± 1.1  | 2.7 ± 0.9  |
| <i>Escherichia-Shigella</i>             | 2.1 ± 2.1  | 4.5 ± 3.1  |
| <i>Bifidobacterium</i>                  | 3.1 ± 1.3  | 2.1 ± 0.7  |
| <i>Dialister</i>                        | 1.1 ± 0.6  | 4.4 ± 2.6  |
| <i>Alistipes</i>                        | 2.2 ± 0.4  | 2.1 ± 0.7  |
| <i>Agathobacter</i>                     | 2.0 ± 0.5  | 1.7 ± 0.7  |
| <i>Anaerostipes</i>                     | 2.2 ± 0.3  | 1.4 ± 0.4  |
| <i>Collinsella</i>                      | 1.4 ± 0.6  | 1.8 ± 0.6  |
| <i>Ruminiclostridium</i> 5 <sup>†</sup> | 0.8 ± 0.2  | 2.6 ± 1.0  |
| <i>Ruminococcus</i> 1                   | 2.1 ± 0.4  | 0.6 ± 0.3  |
| <i>Ruminococcus torques</i> group       | 1.4 ± 0.2  | 1.5 ± 0.3  |
| <i>Lachnospiraceae</i>                  | 1.8 ± 0.4  | 1.0 ± 0.2  |
| <i>Erysipelotrichaceae</i> UCG-003      | 1.8 ± 0.5  | 0.8 ± 0.3  |
| <i>Roseburia</i>                        | 1.9 ± 0.3  | 0.6 ± 0.2  |

N=33 mothers (EBF=20, MF=13). Only genera present in  $\geq 20\%$  of samples and at  $\geq 0.1\%$  abundance are included in the table. Data are expressed mean  $\pm$  SEM and were analyzed using the GLIMMIX procedure including BMI at 6 wk postpartum as a covariate. Values within the same row are significantly different at \* $p \leq 0.5$ ; <sup>†</sup> $p \leq 0.1$ . EBF, exclusively breastfeeding; MF, mixed-feeding.

**Table S8.** Proportion of ASVs (% of total) that different bacterial communities are predicted to contribute to bacterial composition of human milk and infant stool

| Source              | SourceTracker2 | FEAST- Individual | FEAST- Group |
|---------------------|----------------|-------------------|--------------|
| <b>human milk</b>   |                |                   |              |
| Breast skin         | 50.0 ± 6.1     | 57.8 ± 4.7        | 59.5 ± 5.6   |
| Infant saliva       | 9.0 ± 3.3      | 11.1 ± 3.0        | 16.2 ± 3.7   |
| Maternal stool      | 0.04 ± 0.0     | 0.03 ± 0.02       | 0.5 ± 0.3    |
| Maternal saliva     | 0.4 ± 0.1      | 1.0 ± 0.2         | 0.3 ± 0.1    |
| Unknown             | 40.6 ± 5.9     | 30.0 ± 4.6        | 23.4 ± 5.0   |
| <b>infant stool</b> |                |                   |              |
| Human milk          | 0.4 ± 0.1      | 6.3 ± 2.7         | 3.7 ± 1.2    |
| Breast skin         | 0.3 ± 0.1      | 5.8 ± 3.1         | 1.5 ± 0.4    |
| Infant saliva       | 0.3 ± 0.1      | 3.8 ± 1.5         | 2.1 ± 0.7    |
| Maternal stool      | 0.1 ± 0.0      | 12.7 ± 4.2        | 28.3 ± 4.4   |
| Maternal saliva     | 0.2 ± 0.0      | 1.5 ± 1.0         | 2.0 ± 0.8    |
| Unknown             | 98.8 ± 0.2     | 69.9 ± 5.4        | 62.5 ± 4.1   |

Human milk, n=33; infant stool, n=32. Data are expressed mean ± SEM. ASV, amplicon sequence variant.
